# Supplementary material
Source: publisher figshare collection journal article supplement (https://brill.figshare.com/ndownloader/files/36204837)
Supplement: Supplementary file 1 [file 36204837]

**Appendix C: Number of taxa researched per year between 1999 and 2019.**

**Fig. C1**. The number of new species that have been the focus of genetic, DART TOFMS, NIRS and/or stable isotope studies published between 1999 and 2021 whose results are relevant to the determination of geographical origin.
